1 **A new molecular method for the exploration of hybrid**  
2 **zones between two toad species of conservation interest**

3  
4 Zoltán Gál<sup>1¶\*</sup>, Tibor Kovács<sup>2¶</sup>, János Ujszegi<sup>3</sup>, Brandon P. Anthony<sup>4</sup>, Balázs Vági<sup>5</sup> and  
5 Orsolya I. Hoffmann<sup>1</sup>

6

7 <sup>1</sup> NARIC, Agricultural Biotechnology Institute, Gödöllő, Hungary.

8

9 <sup>2</sup> Hungarian Biodiversity Research Society, Budapest, Hungary.

10

11 <sup>3</sup> Lendület Evolutionary Ecology Research Group, Plant Protection Institute, Centre for  
12 Agricultural Research, Budapest, Hungary.

13

14 <sup>4</sup> Department of Environmental Sciences and Policy, Central European University,  
15 Budapest, Hungary.

16

17 <sup>5</sup> University of Debrecen, Department of Evolutionary Zoology and Human Biology,  
18 Debrecen, Hungary.

19

20

21 \*Corresponding author

22 E-mail: [zoltan.gal89@mail.com](mailto:zoltan.gal89@mail.com) (ZG)

23

24

25 ¶ These authors contributed equally to this work

26

## 27 **Abstract**

28 Analyzing hybrid zones between previously isolated lineages allows insight into  
29 processes determining the fate of re-encounter of these taxa. The distributions of Fire-  
30 bellied (*Bombina bombina*) and Yellow-bellied toads (*B. variegata*) meet in the  
31 Carpathian Basin resulting in a narrow contact zone in the foothill regions, where hybrids  
32 often appear. Our aim was to explore a transient zone between *B. bombina* and *B.*  
33 *variegata* within the Carpathian Basin along a transect including the Börzsöny Hills in  
34 Hungary and Krupinská Planina in Slovakia. We visited 28 locations in these areas and  
35 collected altogether 230 specimens, photographed and sampled them using buccal swabs.  
36 In order to distinguish between the two species and determine hybrid individuals, we used  
37 mitochondrial markers and designed a novel technique based on the restriction of the  
38 *Ncx-1* gene. The geographical distribution pattern of these two species delivered  
39 unexpected results, as Börzsöny Hills was completely colonised by *B. bombina* including  
40 locations which can be classified as typical habitats of *B. variegata*. Moreover, in  
41 Krupinská Planina many locations were also colonised by *B. bombina*, including high  
42 altitude ponds. The most remote sites still harbour *B. variegata* populations, but seven of  
43 these were found with hybrid individuals. This pattern may indicate the northward and  
44 altitudinal range expansion of *B. bombina* and the colonisation of habitats of its sister  
45 species in these areas. Our results warrant enhanced attention to hybrid zones, where  
46 introgression and changes in population composition may reflect recent rapid  
47 environmental alterations and redirect conservation focus.

## 48 **Keywords**

49 *Bombina bombina*, *Bombina variegata*, Range expansion, Climate change,  
50 Contact zone, Distribution mapping, Introgression

## 51 **Introduction**

52           One of the main processes driving speciation is geographic isolation due to one or  
53 more vicariant events leading to divergent lineages [1]. On one hand, different ecological  
54 constraints distinctly shape the two lineages, facilitating ecological differentiation (i.e.  
55 adaptation to different habitats). On the other hand, allopatric distribution may lead to the  
56 accumulation of random genetic differences between the isolated lineages. Both types of  
57 genetic divergence may potentiate reproductive isolation. However, if there is insufficient  
58 time available for speciation, incomplete reproductive isolation may result in  
59 hybridization between the sister-lineages upon re-encounter [2,3]. In Europe, several  
60 cases of hybridization are considered to be a consequence of warming periods after glacial  
61 ages, when previously allopatric populations of sister lineages became parapatric due to  
62 area-expansions and came into secondary contact [4]. Analyzing hybrid zones of  
63 genetically and ecologically differentiated, but not reproductively isolated taxa allows  
64 insight into admixture processes determining the fate of the closely related lineages (see  
65 e.g. [5]).

66           The hybrid zone between the European fire-bellied and yellow-bellied toads  
67 (*Bombina bombina* and *B. variegata*; Bombinatoridae) in Central Europe has been  
68 identified by morphologic, electrophoretic and genetic analyses [6–9]. The two species  
69 are similar with a warty, cryptically coloured dorsal and aposematic, brightly coloured  
70 ventral pattern [10,11]. The first attempts to distinguish between sister species and  
71 hybrids were based on morphological characteristics. The most commonly used trait was  
72 the extension and connectivity of the ventral patches at particular body parts,  
73 supplemented with morphometric measurements, including snout-vent length, head  
74 length, head width, distance between eyes, forelimb length, femur length, tibia length,

75 and foot length [8,12]. However, transitional morphological characters between *B.*  
76 *bombina* and *B. variegata* had been observed as early as the 1890s [13], due to  
77 hybridization in the contact zones [9,14]. Therefore, more reliable identification based on  
78 molecular methods were designated including protein electrophoresis [7,9,15,16] and  
79 DNA techniques using mitochondrial [8,17] and nuclear gene markers [18] or  
80 microsatellites [19,20]. Molecular analyses revealed that introgression has not been  
81 detected outside the hybrid zones and the genetic structures vary in pure and hybrid  
82 populations [10,17–19,21,22]. The hybrid zones cover different genetic structures  
83 depending on their location [18].

84 The location of the hybrid zone is determined by environmental factors due to the  
85 diverse adaptations to different habitats of the sister species. The distribution of *B.*  
86 *bombina* covers the lowlands of Europe from Germany to Russia and probably extends  
87 even beyond the Ural Mountains, while *B. variegata* occurs mainly in the highlands of  
88 the Balkan Peninsula, Central and Western Europe and is absent east of the Carpathian  
89 Ridges [23]. Thus, the two species have parapatric distribution with a narrow but extended  
90 contact zone stretching from Germany southward to Bulgaria [24]. Based on mtDNA  
91 analyses, *B. bombina* is composed of two clades confined to Northern and Southern  
92 Europe, with low mtDNA divergence between and within clades [17,18]. In contrast,  
93 mtDNA variation of *B. variegata* in its range is extensive, and four distinct haplotypes  
94 are identified. Hence the overall pattern of their recent distribution reflects a post-glacial  
95 radiation from Balkan, Mediterranean and Carpathian refugia, whereas recolonization of  
96 European habitats by *B. bombina* initiated from one refugium near the Black Sea coast  
97 [17,18,25].

98           The Carpathians and their surrounded basin with complex topography created a  
99    complicated and diverse contact zone between the two species. The inner part of the  
100   Carpathian Basin is divided by mid-sized ridges with the highest elevation of Kékes  
101   (Hungary) up to 1015 m above sea level (asl), where *B. variegata* occurs in isolated  
102   populations inhabiting small temporary ponds and puddles at these mountainous  
103   enclaves. In contrast, previous studies indicate that *B. bombina* prefers larger, more  
104   permanent water bodies at lowland, open areas with more connected populations [21,26].  
105   Due to the different habitat preferences, the two species contact mostly along the foothill  
106   regions, forming an extended contact zone in the Carpathian Basin with resulting hybrid  
107   individuals in many populations [8,16]. Gollmann and colleagues [7] studied a shorter  
108   section of the ridges on the border of northern Hungary and southern Slovakia in the  
109   Aggtelek Karst region and revealed a hybrid zone between the two species with highly  
110   variable population structures. Sas and colleagues [11] reported a pure hybrid population  
111   around Oradea, Romania. Evidence of hybridizing populations from other sections of the  
112   Carpathians were also shown [17,19,22].

113           Our aim was to explore a transient zone between *B. bombina* and *B. variegata* and  
114    assess the distribution of the two species and their hybrids from the inner part of the  
115   Carpathian Basin to the southern edge of the Carpathian Ridges along an approximately  
116   50 km long north-south transect (Fig 1). We also aimed to test a novel molecular approach  
117   to distinguish between the two species and determine hybrid individuals.

118    **Fig 1. Map of the sampling area.** Circles indicate the assessed locations (L1-21) and  
119    empty circles represent locations where individuals were not observed (L22-L28).  
120    Squares represent settlements. White, light grey and dark grey areas represent the relief  
121    under 200 m, between 200-400 m and above 400 m, respectively. Locations containing

122 hybrid individuals are underlined.

## 123 **Materials and Methods**

### 124 **Study area**

125 Börzsöny Hills are located in northern Hungary. In the north they are separated  
126 from Krupinská Planina in Slovakia by Ipeľ River's valley, which also demarcates the  
127 border between the two countries (Fig 1.). The highest elevation in Börzsöny is 938 m asl  
128 and, due to its rugged terrain, most of the valleys are strongly shaded with cold  
129 microclimates. Krupinská Planina is a sibling mountain of Börzsöny in Slovakia having  
130 identical rock material; a Miocene andesite. It is lower (535 m asl), but its terrain is  
131 heavily rugged as well. Published herpetofaunistic data from Börzsöny is old [27] and  
132 while plenty of data were collected in an online database (<https://herpterkep.mme.hu>), no  
133 systematic assessment was made for *Bombina* species prior to this study. The  
134 herpetofauna of Krupinská Planina had hardly been explored before we started our  
135 investigation. The only record was available from Slovakian sources is a summary of a  
136 2-year (2008-2009) data collection. Both *Bombina* species had been found in the survey,  
137 but the author did not analyse their presence deeper [28].

### 138 **Sample collection**

139 We searched for *Bombina* habitats based on literature sources and an online data  
140 base ([herpterkep.mme.hu](https://herpterkep.mme.hu)). Potential habitats were marked on satellite maps  
141 (GoogleEarth). In total, we visited 28 locations (S1 Table) and sampled 230 toads  
142 between 2014 and 2018. Individuals were caught by hand and DNA samples were  
143 collected using a non-invasive buccal swabbing. Each individual was placed into a  
144 transparent plastic box and fixed by gently pressing a plastic sponge against their back.

145 The ventral pattern of each toad was photographed for further analyses (not presented  
146 here, S1 Fig and they were then released at the capture site).

### 147 **Amplification and analysis of the nuclear *Ncx-1* gene**

148 The collected swabs were stored in 70% ethanol until the DNA extraction by  
149 phenol-chloroform method [29]. The following primers were used to amplify a 846 base  
150 pair (bp) long region of the *Ncx-1* gene: NcxF (5'- TCATCCGCTCCTGAAATTCT -3')  
151 and NcxR (5'- CACAGTCCCACAGTTTTCCA -3') [18]. All PCR reactions were  
152 implemented with MyTaq Ready Mix (Bioline) according to the manufacturer's  
153 instructions. The reactions contained 80 ng DNA and 8  $\mu$ M of each primer. The PCR  
154 conditions were the following: an initial denaturation step at 95 °C for 5 min, 30 cycles  
155 with denaturation at 95 °C for 20 sec, an annealing temperature of 62 °C for 20 sec, and  
156 elongation at 72 °C for 20 sec and a final elongation at 72 °C for 2 min. The 846 bp long  
157 PCR product was analysed in 1% agarose gel.

158 To find a restriction fragment length polymorphism (RFLP) loci *Ncx-1* gene,  
159 haplotypes were downloaded from the National Center for Biotechnology Information  
160 (NCBI) and aligned to a consensus sequence both in *B. bombina* and *B. variegata* with  
161 ClustalW2 (EMBL-EBI). Three haplotypes were obtained from *B. bombina* and 16  
162 sequences originated from *B. variegata* according to Fijarczyk et al. [18]. The GenBank  
163 accession numbers can be found in S2 Table. The created *B. bombina* and *B. variegata*  
164 *Ncx-1* consensus sequences were compared pairwise with MultAlign [30]. With  
165 NEBCutter [31] and dCAPS Finder [32] four HpyCH4V restriction enzyme sites  
166 (TG^CA) were detected in *B. bombina*, with one out of four missing from the *B.*  
167 *variegata* sequences (S2 Fig). The amplified PCR fragments were digested with  
168 HpyCH4V enzyme (New England Biolab) at 37 °C for 3 hours. 10  $\mu$ l of each digestion

169 reaction were loaded into 2.5 % TAE agarose gel and GeneRuler™ 1 kb Plus DNA  
170 Ladder (Fermentas) was used as a molecular weight marker. The digestion results in a  
171 694 bp long fragment in case of *B. variegata*. *B. bombina* samples cleave to a 369 bp and  
172 325 bp long fragments. The samples of hybrid individuals carry both the 694 bp, 369 bp  
173 and the 325 bp long fragments. The remaining 152 bp split into 96 bp, 32 bp and 24 bp  
174 long fragments in both genotypes (Fig 2).

175 **Fig 2. Electrophoretic differentiation of the digested PCR fragments specific to Ncx-**  
176 **1 gene.** The amplified PCR product from Ncx-1 gene before enzymatic digestion: *B.*  
177 *variegata* (Bv; identifier of the individual: 101), *B. bombina* (Bb; identifier of the  
178 individual: 189) and hybrid (Bv × Bb; identifier of the individual: 169) Fragments  
179 resulted by the digestion with HpyCH4V restriction enzyme: Bv\* (101), Bv × Bb\* (169),  
180 Bb\* (189). MM - molecular weight marker.

## 181 **Amplification of the mitochondrial fragments**

182 Six samples were processed at each location where one species emerged. All the  
183 samples were analysed at the hybrid locations to detect the types of the mitochondria that  
184 occur. The primers were based on the total *B. bombina* and *B. variegata* mitochondrial  
185 genome at NCBI (EU115993.1, NC\_009258.1). Two mitochondrial primer pairs were  
186 used to distinguish the two species: RadF (5'- CAGCTAGTATCAACCCACCAGAT -  
187 3') and RadR (5'- TTGATCTGTTGCTGGGTACGTCTTG -3') primers are specific for  
188 *B. bombina*, TynF (5'- CAATAAAATTCAACCGCCAACAAT -3') and TynR (5'-  
189 AAGTTGATCTGTTGCTGGGTATGTTCTA -3') primers are specific for *B. variegata*  
190 mitochondria [33]. The PCR reactions were completed with Mytaq Read Mix (Bioline)  
191 according to the manufacturer's instruction. The PCR cycles were the following in case  
192 of the Rad primer pair: an initial denaturation step at 95 °C for 5 min, 35 cycles with



193 denaturation at 95 °C for 20 sec, an annealing temperature of 63 °C for 20 sec, and  
194 elongation at 72 °C for 20 sec and a final elongation at 72 °C for 2 min. With the Tyn  
195 primer pair the same PCR protocol was used except that the annealing temperature was  
196 60 °C. The resulting DNA fragments were analyzed at 2.5 % agarose gel containing  
197 ethidium-bromide with GeneRuler™ 1 kb Plus DNA Ladder (Fermentas). The RadF-R  
198 primers amplify a 173 bp long fragment, the amplicon with the TynF-R primers is 196 bp  
199 long (Fig 3).

200 **Fig 3. The amplification of mitochondrial regions with Tyn and Rad primer pairs**  
201 **specific for *B. bombina* (Bb) and *B. variegata* (Bv) respectively.** According to the  
202 mitochondrial marker the individual 189 carries Bb genotype, while the individual 101  
203 carries Bv genotype. Individual 169 and 175 are hybrids. MM - molecular weight marker.

## 204 **Sequencing**

205 The PCR amplified *Ncx-1* gene fragments were sequenced by Sanger sequencing  
206 (Eurofins Genomics, Ebersberg, Germany), and resulting chromatograms analysed with  
207 Chromas 2.6.5 software (Technelyium).

## 208 **Results**

### 209 **Identifying a new nuclear marker in *Ncx-1* gene**

210 Altogether, we analysed 230 samples from 21 sampling sites located in Hungary  
211 and Slovakia (Table 1). We could successfully amplify an 846 bp long fragment of the  
212 *Ncx-1* gene in all 230 cases. The designed restriction enzyme digestion with HpyCH4V  
213 could distinguish between the consensus sequences assigned to the two species and the  
214 hybrid individuals. To validate our results, we Sanger sequenced 4 *B. variegata*, 7 *B.*  
215 *bombina* and all the 26 hybrid individuals. The sequencing confirmed the result of the

216 *Ncx-1* digestion in all cases as the heterozygous locus was specific to the individuals  
217 which were considered hybrids based on the digestion fragment composition (S2 Fig).

218 **Table 1. Species identification results according to nuclear marker *Ncx-1* at each**  
219 **location.**

| Location   | Sample size | Nuclear marker |           |           |
|------------|-------------|----------------|-----------|-----------|
|            |             | Bb             | Bv        | H         |
| L1         | 29          | 29             | -         | -         |
| L2         | 1           | 1              | -         | -         |
| L3         | 2           | 2              | -         | -         |
| L4         | 11          | 11             | -         | -         |
| L5         | 15          | 15             | -         | -         |
| L6         | 5           | 5              | -         | -         |
| L7         | 10          | 10             | -         | -         |
| L8         | 10          | 10             | -         | -         |
| L9         | 15          | 15             | -         | -         |
| L10        | 5           | 5              | -         | -         |
| L11        | 6           | 6              | -         | -         |
| L12        | 19          | 14             | -         | 5         |
| L13        | 20          | 20             | -         | -         |
| L14        | 15          | 15             | -         | -         |
| L15        | 3           | 2              | -         | 1         |
| L16        | 9           | -              | 6         | 3         |
| L17        | 34          | 6              | 14        | 14        |
| L18        | 7           | -              | 6         | 1         |
| L19        | 2           | -              | 2         | -         |
| L20        | 10          | 5              | 4         | 1         |
| L21        | 2           | -              | 1         | 1         |
| <b>Sum</b> | <b>230</b>  | <b>171</b>     | <b>33</b> | <b>26</b> |

220 Abbreviations: Bb: *Bombina bombina*, Bv: *Bombina variegata*, H: hybrid individual

## 221 mtDNA markers

222 One hundred and nineteen samples were analysed with two mitochondrial markers  
223 from 14 locations (including all 7 locations with hybrids and half of the locations where  
224 only *B. bombina* was found) with the two primer pairs that can distinguish between the  
225 *B. bombina* and *B. variegata* mitochondria. The analysed 119 samples showed that the

226 phenotype and the *Ncx-1* gene results agreed with the mitochondrial markers at all 7 tested  
227 locations where we found only *B. bombina* individuals (Table 1). Among the 7 sites with  
228 hybrids, at one location the mitochondrial markers revealed *B. bombina* genotype, at five  
229 locations the results showed *B. variegata* mitochondria. There was one location at the  
230 hybrid zone - Plášťovce (L12) - where we detected both *B. bombina* and *B. variegata*  
231 mitochondrion. Table 2 summarizes the result of the analyses based on the two  
232 mitochondrial markers in 22 hybrid individuals (in 4 individuals we failed to amplify  
233 mtDNA; see S3 Table for more details).

234 **Table 2. Combined mitochondrial and nuclear genotypes of individuals from**  
235 **locations where hybrids occurred.**

| <b>Nuclear marker</b> | <b>Mitochondrial marker</b> | <b>Sample size</b> | <b>Location ID</b>         |
|-----------------------|-----------------------------|--------------------|----------------------------|
| Bb                    | Bb                          | 14                 | L12, L15, L17              |
| Bb                    | Bv                          | 7                  | L17, L20                   |
| Bv                    | Bv                          | 27                 | L16, L17, L18, L20,<br>L21 |
| H                     | Bb                          | 3                  | L12, L15                   |
| H                     | Bv                          | 19                 | L12, L16, L17, L18,<br>L20 |

236 Abbreviations: Bb: *Bombina bombina*, Bv: *Bombina variegata*, H: hybrid individual

## 237 **Distribution of the two species in the study area**

238 Based on our species identification method, *Bombina bombina* occurred at 17  
239 locations (including all locations in Börzsöny Hills), while *B. variegata* occurred at six  
240 locations. In 13 locations all individuals proved to be *B. bombina*. At one location  
241 (Čekovce) we found only *B. variegata*. We identified 7 locations where hybrid  
242 individuals occurred. In total, we caught 26 hybrid individuals identified with the *Ncx-1*  
243 nuclear gene marker at seven locations: Plášťovce, Brezovo, Čabrad, Litava, Medovarce,

244 Pribelce, Chrťany. At Litava and Pribelce we found both *B. bombina*, *B. variegata* and  
245 also hybrid toads.

246 The examined toad populations in the Börzsöny Hills and the Ipel' Valley consist  
247 of *B. bombina* specimens, and both species were found in the Krupinská Planina area. *B.*  
248 *variegata* appears exclusively in the coolest, remote mountainous areas of the region,  
249 while the edges of the plateau at even higher elevations were occupied by *B. bombina*.  
250 On average, *B. variegata* occupied higher elevations than *B. bombina*, but the two species  
251 reached the same maximum altitude. Hybrids occurred at intermediate altitude between  
252 the two species median elevations (Fig 4). However, there was no significant difference  
253 between the altitudinal distributions of the two species and their hybrids (one-way  
254 ANOVA, for all location:  $F_{2,27} = 0.473$ ;  $P = 0.63$ ; only for locations in Krupinská Planina,  
255 excluding *B. bombina* sites in Börzsöny and Ipel' Valley:  $F_{2,18} = 1.064$ ;  $P = 0.37$ ). In the  
256 northern half of the Krupinská Planina we investigated 7 more locations (all artificial  
257 ponds), where we did not find any *Bombina* specimens (Fig 1).

258 **Fig 4. The altitudinal distribution of the two species and their hybrids in the two**  
259 **areas.** Horizontal line is the median, whiskers represent range, boxes represent  
260 interquartiles and the circle indicates an outlier (deviating from the boundary of the  
261 interquartile range (IQR) by more than  $1.5 \times \text{IQR}$ ).

## 262 Discussion

263 Our study has four main achievements. First, using restricted digestion of a  
264 nuclear gene we invented a new genetic test for the identification of *B. bombina* and *B.*  
265 *variegata* and their hybrids. Second, we successfully applied this method on *Bombina*  
266 samples from a putative hybrid zone and identified the two homozygous and the  
267 heterozygous genotypes. Third, we compared the nuclear genotypes of the sampled

268 individuals with their haplotypes to a mitochondrial marker and found various genomic  
269 combinations in the actual hybrid zone. Fourth, we identified that, in contrast to Börzsöny  
270 Hills, Krupinská Planina is inhabited by both *B. bombina* and *B. variegata* populations  
271 which produce hybrids in their contact zones.

## 272 **Evaluation of molecular identification**

273 The distribution patterns we explored are characteristically different at the two  
274 sides of the Ipeľ Valley. While in Börzsöny Hills (Hungary) we found only pure *B.*  
275 *bombina* populations even at the highest locations and in the smallest wheel track water  
276 bodies, in Krupinská Planina (Slovakia) the distribution of the two species and hybrids  
277 show a clear geographic and altitudinal pattern. *B. bombina* occupies the lowest and more  
278 southern locations, while *B. variegata* occurs at the most northern location and highest  
279 altitude, while intermediate locations (both in altitudinal and geographic terms) are  
280 inhabited by hybrid populations, where *B. variegata* appear to be the more abundant  
281 parent species. It is an interesting question if Börzsöny Hills harboured *B. variegata*  
282 populations in the past. Today's remaining *B. variegata* populations in northern Hungary  
283 are mostly found in ranges including Zemplén or Aggtelek which are continuous with the  
284 Slovakian Carpathians. However, there is still *B. variegata* in Mátra Hills, a range very  
285 similar to Börzsöny in its more isolated location and geography. If *B. variegata* occurred  
286 in Börzsöny Hills in the past, it has been most likely outcompeted by its congener, which  
287 may be a potential genetic outcome of the introgression if environmental conditions  
288 favour one of the species. However, we did not detect hybridization introgression, as we  
289 only found pure *B. bombina* specimens in Börzsöny, based on both the nuclear and  
290 mitochondrial genomes.

291 In contrast, in the Krupinská Planina the greatest frequency of hybrid individuals  
292 has *B. variegata* mitochondrial haplotype. This suggests that most hybrids have *B.*  
293 *variegata* maternal origins, implying that hybridization arose from matings between *B.*  
294 *variegata* females and *B. bombina* males. This is consistent with the pattern in other frog  
295 species, where males disperse further than females [34], and that indiscriminate, coercive  
296 male frogs readily mate with heterospecific females both under experimental and natural  
297 conditions [35,36]. As hybrids occurred mostly alongside *B. variegata* individuals, it  
298 seems likely that *B. bombina* genes introgressed into these populations via occasional  
299 dispersal of *B. bombina* individuals.

300 Climate change will alter (or most probably already is altering) the recent pattern  
301 of habitats and biotopes of Europe and the entire globe as it has become clear by the end  
302 of the 20<sup>th</sup> century [37,38]. As a response, several species will certainly shift their range  
303 adapting to the new circumstances [39,40]. Although in many cases studies revealed rapid  
304 and sometimes irreversible decline in amphibian populations as a consequence of global  
305 warming [41–43], some species will respond by dispersing and expanding their ranges  
306 [44]. The current isolated distribution patches of *B. variegata* probably resulted from the  
307 recent spreading of its congener, which outcompeted it from lower elevations of its former  
308 distribution area [8]. This scenario may also have occurred in the Börzsöny Hills,  
309 according to our results. In our case, we posit that if characteristically lowland species (*B.*  
310 *bombina*) colonize habitats where the ecological conditions would be more favourable  
311 for highland species (*B. variegata*), it reflects a current area expansion of the first species.  
312 Possible area expansion of *B. bombina* has been documented during the last decade at the  
313 northern edge of its range [45]. In Brandenburg province of Eastern Germany a detailed  
314 analysis suggested a possible area expansion of *B. bombina*, as further habitats are

315 becoming suitable for the species due to predicted changes in climate and associated  
316 future environmental conditions [46].

317 As we did not investigate *Bombina* dispersal processes between ponds in our study  
318 area, nor their individual or environmental factors, we can only speculate that absence of  
319 either species in the artificial ponds in the northernmost portion of our study site is a result  
320 of (i) the relatively short time since these ponds have been established coupled with  
321 relatively short dispersal distances of *Bombina* species [47], (ii) barriers to dispersal  
322 within the landscape matrix including unsuitable microclimates and habitat for facilitating  
323 movement [48], and/or (iii) the fact that these permanent ponds were artificial, deeper and  
324 moderate in size which are less likely to be utilized by *B. variegata* in such contexts [49].  
325 Nevertheless, we feel that extended investigation of ongoing patterns of dispersal,  
326 occupancy and interspecific dynamics in such hybrid zones is warranted.

327 Both *Bombina* species are considered reliable indicators of habitat quality and  
328 listed under the European Union's Council Directive 92/43/EEC on the conservation of  
329 natural habitats and of wild fauna and flora (<https://eur-lex.europa.eu>). Being species of  
330 community interest, their population sizes should be regularly monitored. Our research  
331 highlights that special attention should be paid to hybrid zones, where changes of  
332 population composition may reflect effects of recent rapid environmental alterations,  
333 most notably climatic changes. As morphological identification of individuals could be  
334 problematic due to the large overlap between phenotypes, our new and simple genetic  
335 method provides a useful tool to track the hybrid populations genetic composition.

## 336 **Acknowledgements**

337 Mitochondrial primers were kindly provided by the Jacek M. Szymura lab. The  
338 authors would like to thank to Peter Mikulicek and Daniel Jablonski for their advices on

339 *Bombina* habitats in Slovakia and their help in receiving the Slovak licence, Attila László  
340 Péntek, Anna Fekete, Marietta Tóth, Márta Egyed and Tímea Bozsoky for their help  
341 during data collection.

## 342 **References**

- 343 [1] Riddle BR, Hafner DJ, Alexander LF, Jaeger JR. Cryptic vicariance in the  
344 historical assembly of a Baja California peninsular desert biota. Proc Natl Acad  
345 Sci U S A 2000;97:14438–43. <https://doi.org/10.1073/pnas.250413397>.
- 346 [2] Barton NH, Hewitt GM. Analysis of Hybrid Zones. Annu Rev Ecol Syst  
347 1985;16:113–48. <https://doi.org/10.1146/annurev.es.16.110185.000553>.
- 348 [3] Harrison RG. Hybrid zones and the evolutionary process. Oxford Univ Press  
349 1993:364.
- 350 [4] Hewitt G. The genetic legacy of the Quaternary ice ages. Nature 2000;405:907–  
351 13. <https://doi.org/10.1038/35016000>.
- 352 [5] Arntzen JW, Canestrelli D, Martínez-Solano I. Environmental correlates of the  
353 European common toad hybrid zone. Contrib to Zool 2020;89:270–81.  
354 <https://doi.org/10.1163/18759866-bja10001>.
- 355 [6] Szymura JM, Barton NH. Genetic analysis of a hybrid zone between the Fire-  
356 bellied toads, *Bombina bombina* and *B. variegata*, near Cracow in Southern  
357 Poland. Evolution (N Y) 1986;40:1141–59. [https://doi.org/10.1111/j.1558-  
358 5646.1986.tb05740.x](https://doi.org/10.1111/j.1558-5646.1986.tb05740.x).
- 359 [7] Gollmann G, Roth P, Hodl W. Hybridization between the fire-bellied toads  
360 *Bombina bombina* and *Bombina variegata* in the karst regions of Slovakia and  
361 Hungary: morphological and allozyme evidence. J Evol Biol 1988;1:3–14.  
362 <https://doi.org/10.1046/j.1420-9101.1988.1010003.x>.



- 363 [8] Vörös J, Alcobendas M, Martínez-Solano I, García-París M. Evolution of  
364 *Bombina bombina* and *Bombina variegata* (Anura: Discoglossidae) in the  
365 Carpathian Basin: A history of repeated mt-DNA introgression across species.  
366 Mol Phylogenet Evol 2006;38:705–18.  
367 <https://doi.org/10.1016/j.ympev.2005.08.010>.
- 368 [9] Szymura JM. Hybridization between Discoglossid toads *Bombina bombina* and  
369 *Bombina variegata* in southern Poland as revealed by the electrophoretic  
370 technique. J Zool Syst Evol Res 2009;14:227–36. [https://doi.org/10.1111/j.1439-](https://doi.org/10.1111/j.1439-0469.1976.tb00938.x)  
371 [0469.1976.tb00938.x](https://doi.org/10.1111/j.1439-0469.1976.tb00938.x).
- 372 [10] Szymura JM, Barton NH. The genetic structure of the hybrid zone between the  
373 fire bellied toads *Bombina bombina* and *B. variegata* : comparison between  
374 transects and between loci. Evolution (N Y) 1991;45:237–61.  
375 <https://doi.org/10.1111/j.1558-5646.1991.tb04400.x>.
- 376 [11] Sas I, Covaciu-Marcov S-D, Pop M, Ile R-D, Szeibel N, Duma C. About a closed  
377 hybrid population between *Bombina bombina* and *Bombina variegata* from  
378 Oradea (Bihor county, Romania). North West J Zool 2005;1:41–60.
- 379 [12] Gollmann G. Allozymic and morphological variation in the hybrid zone between  
380 *Bombina bombina* and *Bombina variegata* (Anura, Discoglossidae) in  
381 northeastern Austria. J Zool Syst Evol Res 2009;22:51–64.  
382 <https://doi.org/10.1111/j.1439-0469.1984.tb00562.x>.
- 383 [13] Méhely L. A magyar fauna Bombinatorjai. II. Hazánk egy új Tritonja: Tr.  
384 (Molge) montandoni Blgr. [I. Bombinatoren der ungarischen Fauna. II. Ein neuer  
385 Triton: Tr. (Molge) montandoni Blgr./ unseres Landes.]. Mathem Természettud  
386 Közl 1892;24:553–74.

- 387 [14] Covaciu-Marcov SD, Ferenti S, Bogdan H, Groza MI, Bata ZS. On the hybrid  
388 zone between *Bombina bombina* and *Bombina variegata* in Livada Forest, north-  
389 western Romania. *Biharean Biol* 2009;3:5–12.
- 390 [15] Szymura JM. Genetic differentiation between hybridizing species *Bombina*  
391 *bombina* and *Bombina variegata* (Salientia, Discoglossidae) in Poland\*.  
392 *Amphibia-Reptilia* 1983;4:137–45. <https://doi.org/10.1163/156853883x00058>.
- 393 [16] Gollmann G. *Bombina bombina* and *Bombina variegata* in the Mtra mountains  
394 (Hungary): New data on distribution and hybridization (Amphibia, Anura,  
395 Discoglossidae). *Amphibia-Reptilia* 1987;8:213–24.  
396 <https://doi.org/10.1163/156853887X00252>.
- 397 [17] Hofman S, Spolsky C, Uzzel T, Cogalniceanu D, Babik W, Szymura JM.  
398 Phylogeography of the fire-bellied toads *Bombina*: independent Pleistocene  
399 histories inferred from mitochondrial genomes. *Mol Ecol* 2007;16:2301–16.  
400 <https://doi.org/10.1111/j.1365-294X.2007.03309.x>.
- 401 [18] Fijarczyk A, Nadachowska K, Hofman S, Litvinchuk SN, Babik W, Stuglik M, et  
402 al. Nuclear and mitochondrial phylogeography of the European fire-bellied toads  
403 *Bombina bombina* and *Bombina variegata* supports their independent histories.  
404 *Mol Ecol* 2011;20:3381–98. <https://doi.org/10.1111/j.1365-294X.2011.05175.x>.
- 405 [19] Vines TH, Khler SC, Thiel M, Ghira I, Sands TR, MacCallum CJ, et al. The  
406 maintenance of reproductive isolation in a mosaic hybrid zone between the fire-  
407 bellied toads *Bombina bombina* and *B. variegata*. *Evolution* 2003;57:1876–88.
- 408 [20] Nrnberger B, Barton NH, Kruuk LEB, Vines TH. Mating patterns in a hybrid  
409 zone of fire-bellied toads (*Bombina*): inferences from adult and full-sib  
410 genotypes. *Heredity (Edinb)* 2005;94:247–57.

- 411 <https://doi.org/10.1038/sj.hdy.6800607>.
- 412 [21] MacCallum CJ, Nürnberger B, Barton NH, Szymura JM. Habitat preference in  
413 the *Bombina* hybrid zone in Croatia. *Evolution* (N Y) 1998;52:227–39.  
414 <https://doi.org/10.1111/j.1558-5646.1998.tb05156.x>.
- 415 [22] Yanchukov A, Hofman S, Szymura JM, Mezhzherin S V, Morozov-Leonov SY,  
416 Barton NH, et al. Hybridization of the *Bombina* and *B. Variegata* (Anura,  
417 Discoglossidae) at a sharp ecotone in Western Ukraine: comparisons across  
418 transects and over time. *Evolution* (N Y) 2006;60:583–600.
- 419 [23] Arnold HR. Atlas of amphibians and reptiles in Britain. Muséum national  
420 d’histoire naturelle; 1995.
- 421 [24] Harrison RG (Richard G, Biology IC of S and E. Hybrid zones and the  
422 evolutionary process. Coll Park Md 1993:364.
- 423 [25] Arntzen JW. Some Hypotheses on Postglacial Migrations of the Fire-Bellied  
424 Toad, *Bombina bombina* (Linnaeus) and the Yellow-Bellied Toad, *Bombina*  
425 *variegata* (Linnaeus). *J Biogeogr* 1978;5:339. <https://doi.org/10.2307/3038027>.
- 426 [26] Indykiewicz P. Urban fauna : studies of animal biology, ecology and  
427 conservation in European cities. Uniwersytet Technologiczno-Przyrodniczy;  
428 2011.
- 429 [27] Szabó I. Adatok a Börzsöny-hegység herpetofaunájához (Data to the  
430 herpetofauna of the Börzsöny Mountains). *VertebrHung* 1960;2:199–216.
- 431 [28] Urban P. Poznámky k výskytu obojživelníků ( Lissamphibia ) vybraných  
432 antropogenných vodních nádrží Krupinskej planiny 2009.
- 433 [29] Sambrook J, Russell DW (David W. Molecular cloning : a laboratory manual.  
434 Cold Spring Harbor Laboratory Press; 2001.

- 435 [30] Corpet F. Multiple sequence alignment with hierarchical clustering. *Nucleic*  
436 *Acids Res* 1988;16:10881–90.
- 437 [31] Vincze T, Posfai J, Roberts RJ. NEBcutter: A program to cleave DNA with  
438 restriction enzymes. *Nucleic Acids Res* 2003;31:3688–91.
- 439 [32] Neff MM, Turk E, Kalishman M. Web-based primer design for single nucleotide  
440 polymorphism analysis. *Trends Genet* 2002;18:613–5.
- 441 [33] Pabijan M, Spolsky C, Uzzell T, Szymura JM. Comparative Analysis of  
442 Mitochondrial Genomes in *Bombina* (Anura; Bombinatoridae). *J Mol Evol*  
443 2008;67:246–56. <https://doi.org/10.1007/s00239-008-9123-3>.
- 444 [34] Wang W, Li J, Wang H, Ran Y, Wu H. Genetic evidence reveals male-biased  
445 dispersal of the Omei tree frog. *J Zool* 2020;310:201–9.  
446 <https://doi.org/10.1111/jzo.12749>.
- 447 [35] Hettyey A, Vági B, Kovács T, Ujszegi J, Katona P, Szederkényi M, et al.  
448 Reproductive interference between *Rana dalmatina* and *Rana temporaria* affects  
449 reproductive success in natural populations. *Oecologia* 2014;176:457–64.  
450 <https://doi.org/10.1007/s00442-014-3046-z>.
- 451 [36] Vági B, Hettyey A. Intraspecific and interspecific competition for mates: *Rana*  
452 *temporaria* males are effective satyrs of *Rana dalmatina* females. *Behav Ecol*  
453 *Sociobiol* 2016;70:1477–84. <https://doi.org/10.1007/s00265-016-2156-5>.
- 454 [37] Mccarty JP. Ecological Consequences of Recent Climate Change. *Conserv Biol*  
455 2001;15:320–31.
- 456 [38] Walther GR. Community and ecosystem responses to recent climate change.  
457 *Philos Trans R Soc B Biol Sci* 2010;365:2019–24.  
458 <https://doi.org/10.1098/rstb.2010.0021>.

- 459 [39] Lindner M, Maroschek M, Netherer S, Kremer A, Barbati A, Garcia-Gonzalo J,  
460 et al. Climate change impacts, adaptive capacity, and vulnerability of European  
461 forest ecosystems. *For Ecol Manage* 2010;259:698–709.  
462 <https://doi.org/10.1016/j.foreco.2009.09.023>.
- 463 [40] Bellard C, Bertelsmeier C, Leadley P, Thuiller W, Courchamp F. Impacts of  
464 climate change on the future of biodiversity. *Ecol Lett* 2012;15:365–77.  
465 <https://doi.org/10.1111/j.1461-0248.2011.01736.x>.
- 466 [41] Carey C, Alexander MA. Climate change and amphibian declines: is there a link?  
467 *Divers Distrib* 2003;9:111–21.
- 468 [42] Lips KR, Diffendorfer J, Mendelson JR, Sears MW. Riding the Wave:  
469 Reconciling the Roles of Disease and Climate Change in Amphibian Declines.  
470 *PLoS Biol* 2008;6:e72. <https://doi.org/10.1371/journal.pbio.0060072>.
- 471 [43] Blaustein AR, Walls SC, Bancroft BA, Lawler JJ, Searle CL, Gervasi SS. Direct  
472 and Indirect Effects of Climate Change on Amphibian Populations. *Diversity*  
473 2010;2:281–313. <https://doi.org/10.3390/d2020281>.
- 474 [44] Araújo Jo MB, Thuiller W, Pearson RG. Climate warming and the decline of  
475 amphibians and reptiles in Europe. *J Biogeogr* 2006;33:1712–1728.  
476 <https://doi.org/10.1111/j.1365-2699.2006.01482.x>.
- 477 [45] Pupina A PM. Fire-bellied toads *Bombina bombina* L. ( Anura: Bombinatoridae )  
478 populations expansion in 2010 in Latvia. *Atti IX Congr Naz Della Soc Herpetol*  
479 *Ital Bari-Conversano* 2013:343–346.
- 480 [46] Dolgener N, Freudenberger L, Schluck M, Schneeweiss N, Ibsch PL, Tiedemann  
481 R. Environmental niche factor analysis (ENFA) relates environmental parameters  
482 to abundance and genetic diversity in an endangered amphibian, the fire-bellied-

483 toad (*Bombina bombina*). *Conserv Genet* 2014;15:11–21.

484 <https://doi.org/10.1007/s10592-013-0517-4>.

485 [47] Barandun J, Reyer H-U. Reproductive Ecology of *Bombina variegata*: Habitat  
486 Use. *Copeia* 1998;1998:497–500. <https://doi.org/10.2307/1447450>.

487 [48] Cayuela H, Valenzuela-Sánchez A, Teulier L, Martínez-Solano Í, Léna J-P,  
488 Merilä J, et al. Determinants and Consequences of Dispersal in Vertebrates with  
489 Complex Life Cycles: A Review of Pond-Breeding Amphibians. *Q Rev Biol*  
490 2020;95:1–36. <https://doi.org/10.1086/707862>.

491 [49] Hartel T, von Wehrden H. Farmed Areas Predict the Distribution of Amphibian  
492 Ponds in a Traditional Rural Landscape. *PLoS One* 2013;8:e63649.

493

## 494 **Supporting information**

495 **S1 Fig. Photos of three individuals (Bv, Bv x Bb, Bb).** Sampling locations and  
496 individual IDs are indicated at the photos.

497 **S2 Fig. Side-by-side alignment of Bv consensus and Bb consensus sequence of the**  
498 ***Ncx-1* gene.** Stars represent the distinct nucleotides. Underlined regions mark the  
499 recognition site of the HpyCH4V restriction enzyme.

500 **S1 Table. The name and geocoordinates of sampling locations.**

501 **S2 Table. GenBank accession numbers of the sequences used to align the consensus**  
502 **sequence of the *Ncx-1* gene.**

503 **S3 Table. Combined mitochondrial and nuclear genotypes of individuals at each**  
504 **locations where hybrids were found.** In case of 2 individual in L12, 6 individuals in  
505 L20 and 1 individual in L17, L18 and L21 we failed to amplify any mtDNA. In L12,  
506 L17 and L18 the individuals was 1hybrids according to the nuclear marker.

507 **S4 Table. Sample size of individuals of which mtDNA amplification was failed at**  
508 **each location of the hybrid zone**



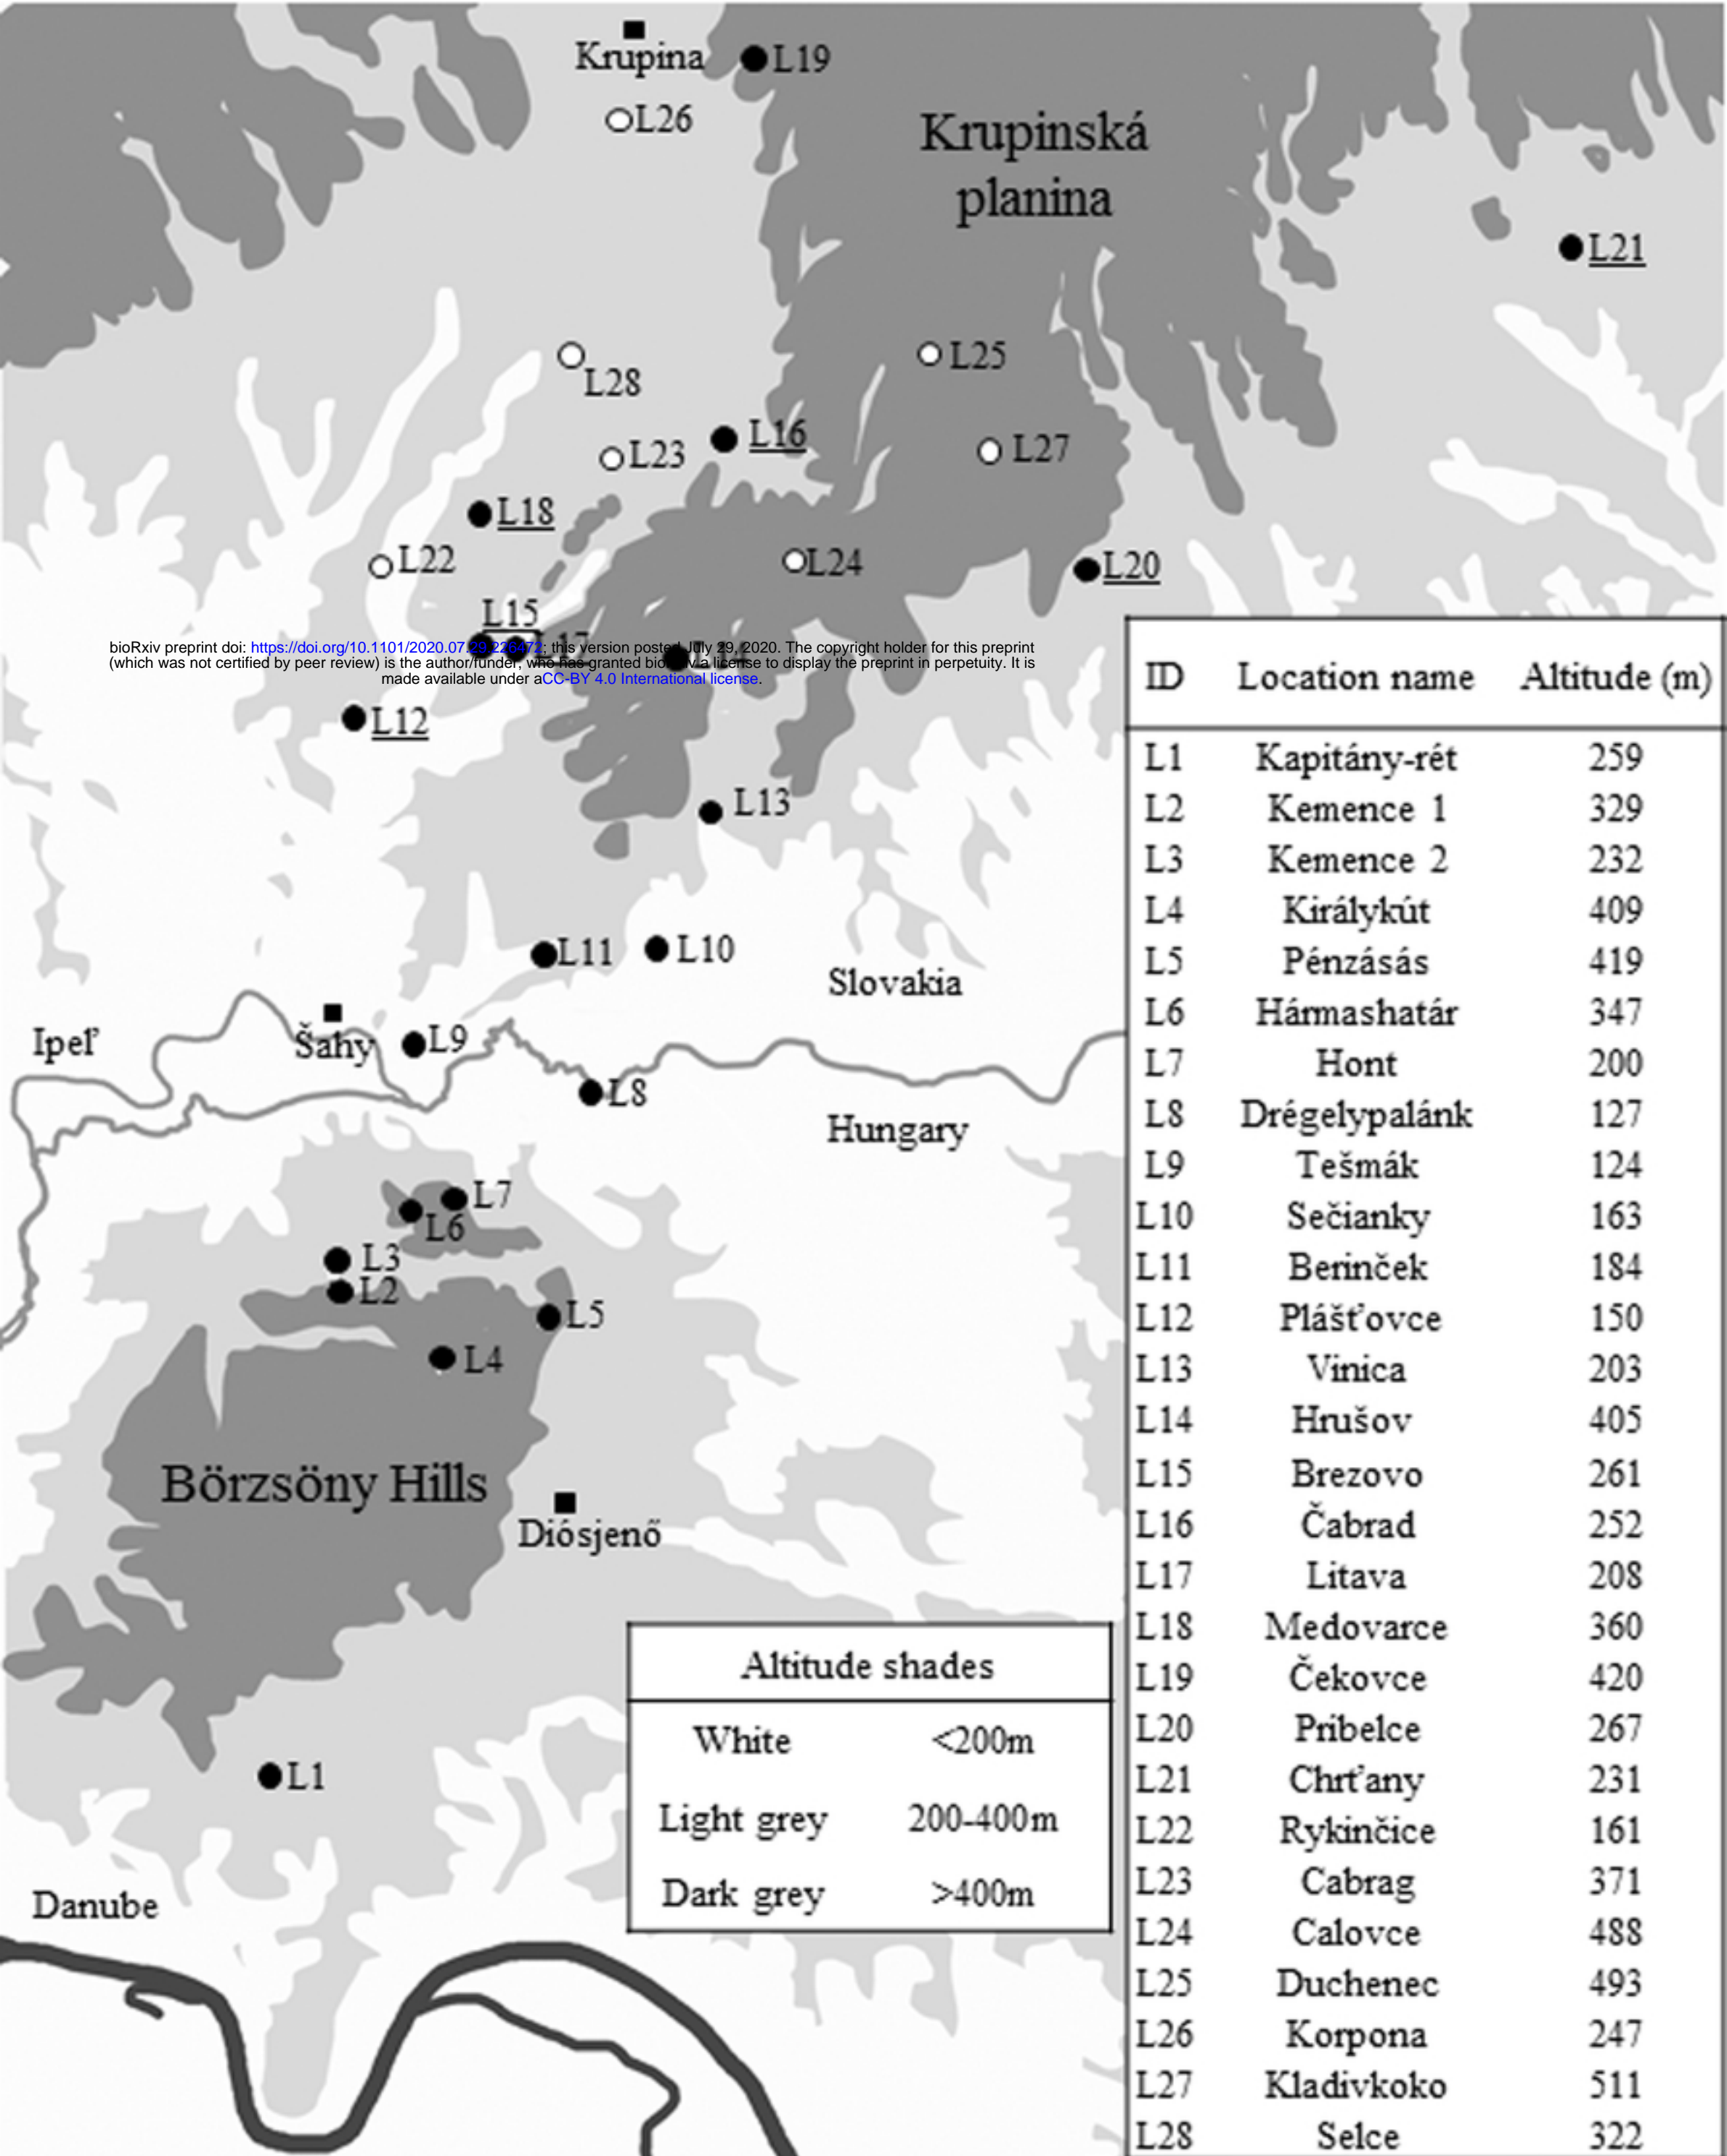

Fig1



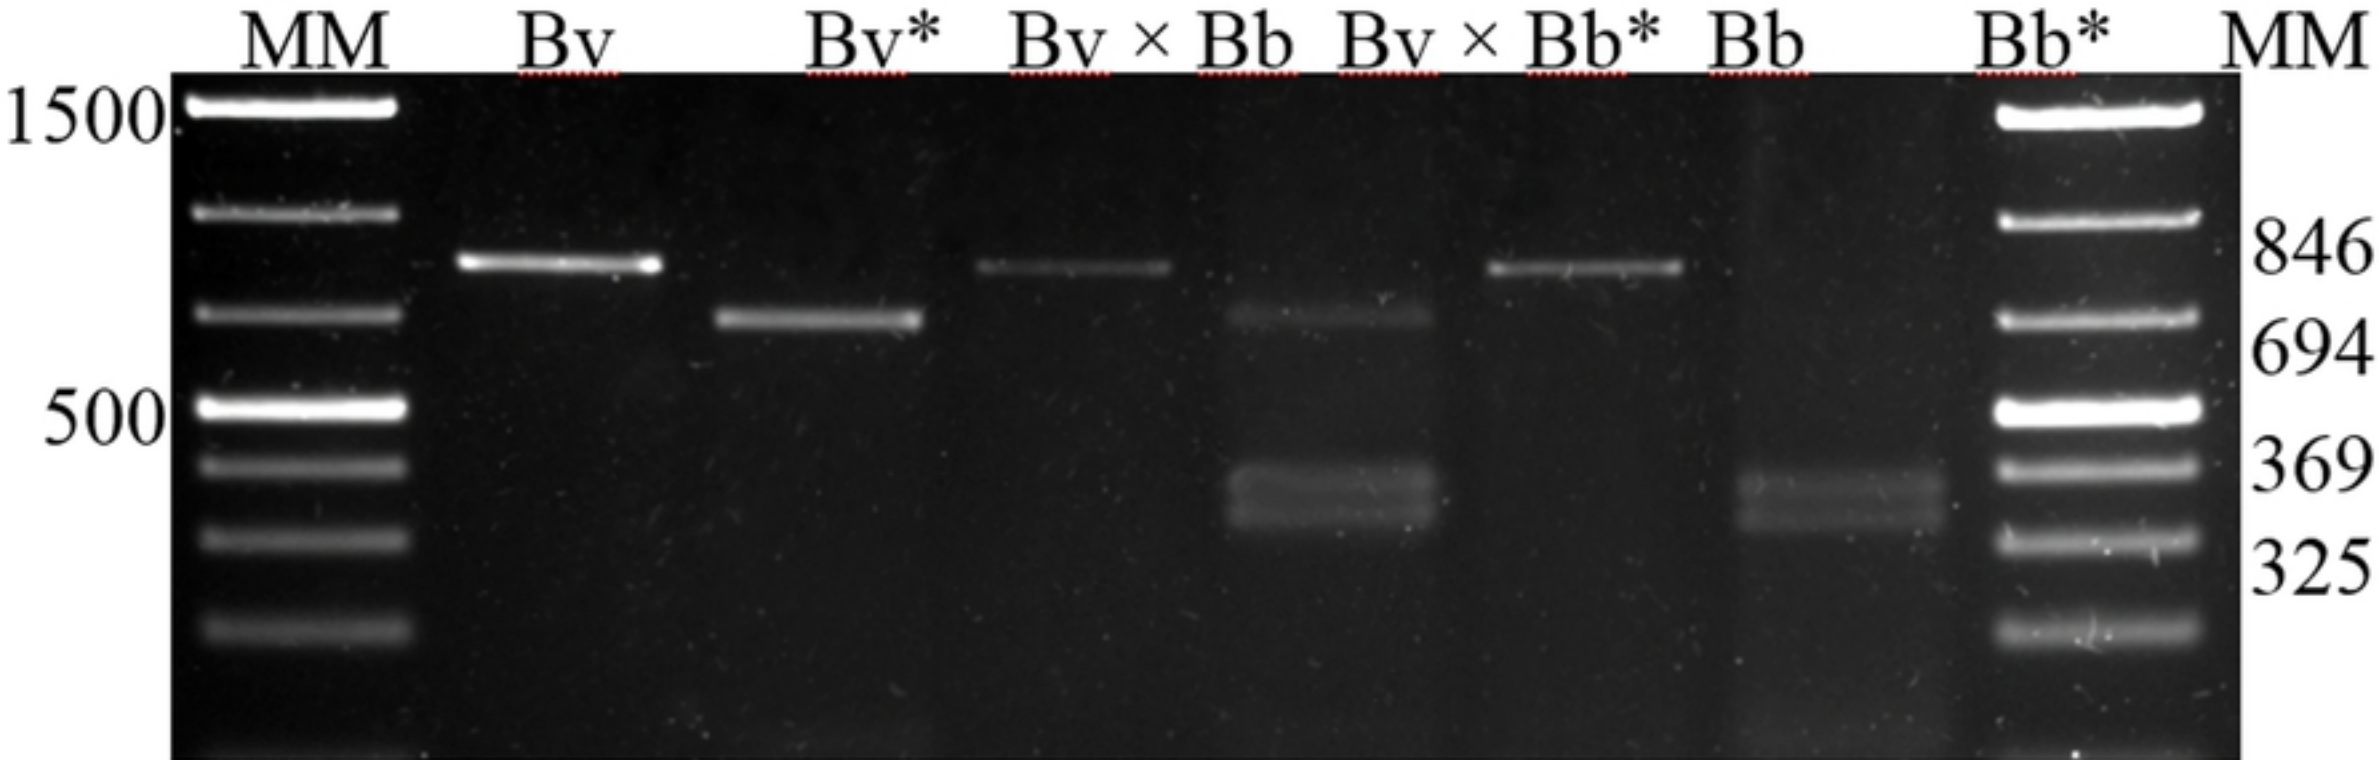

Fig2



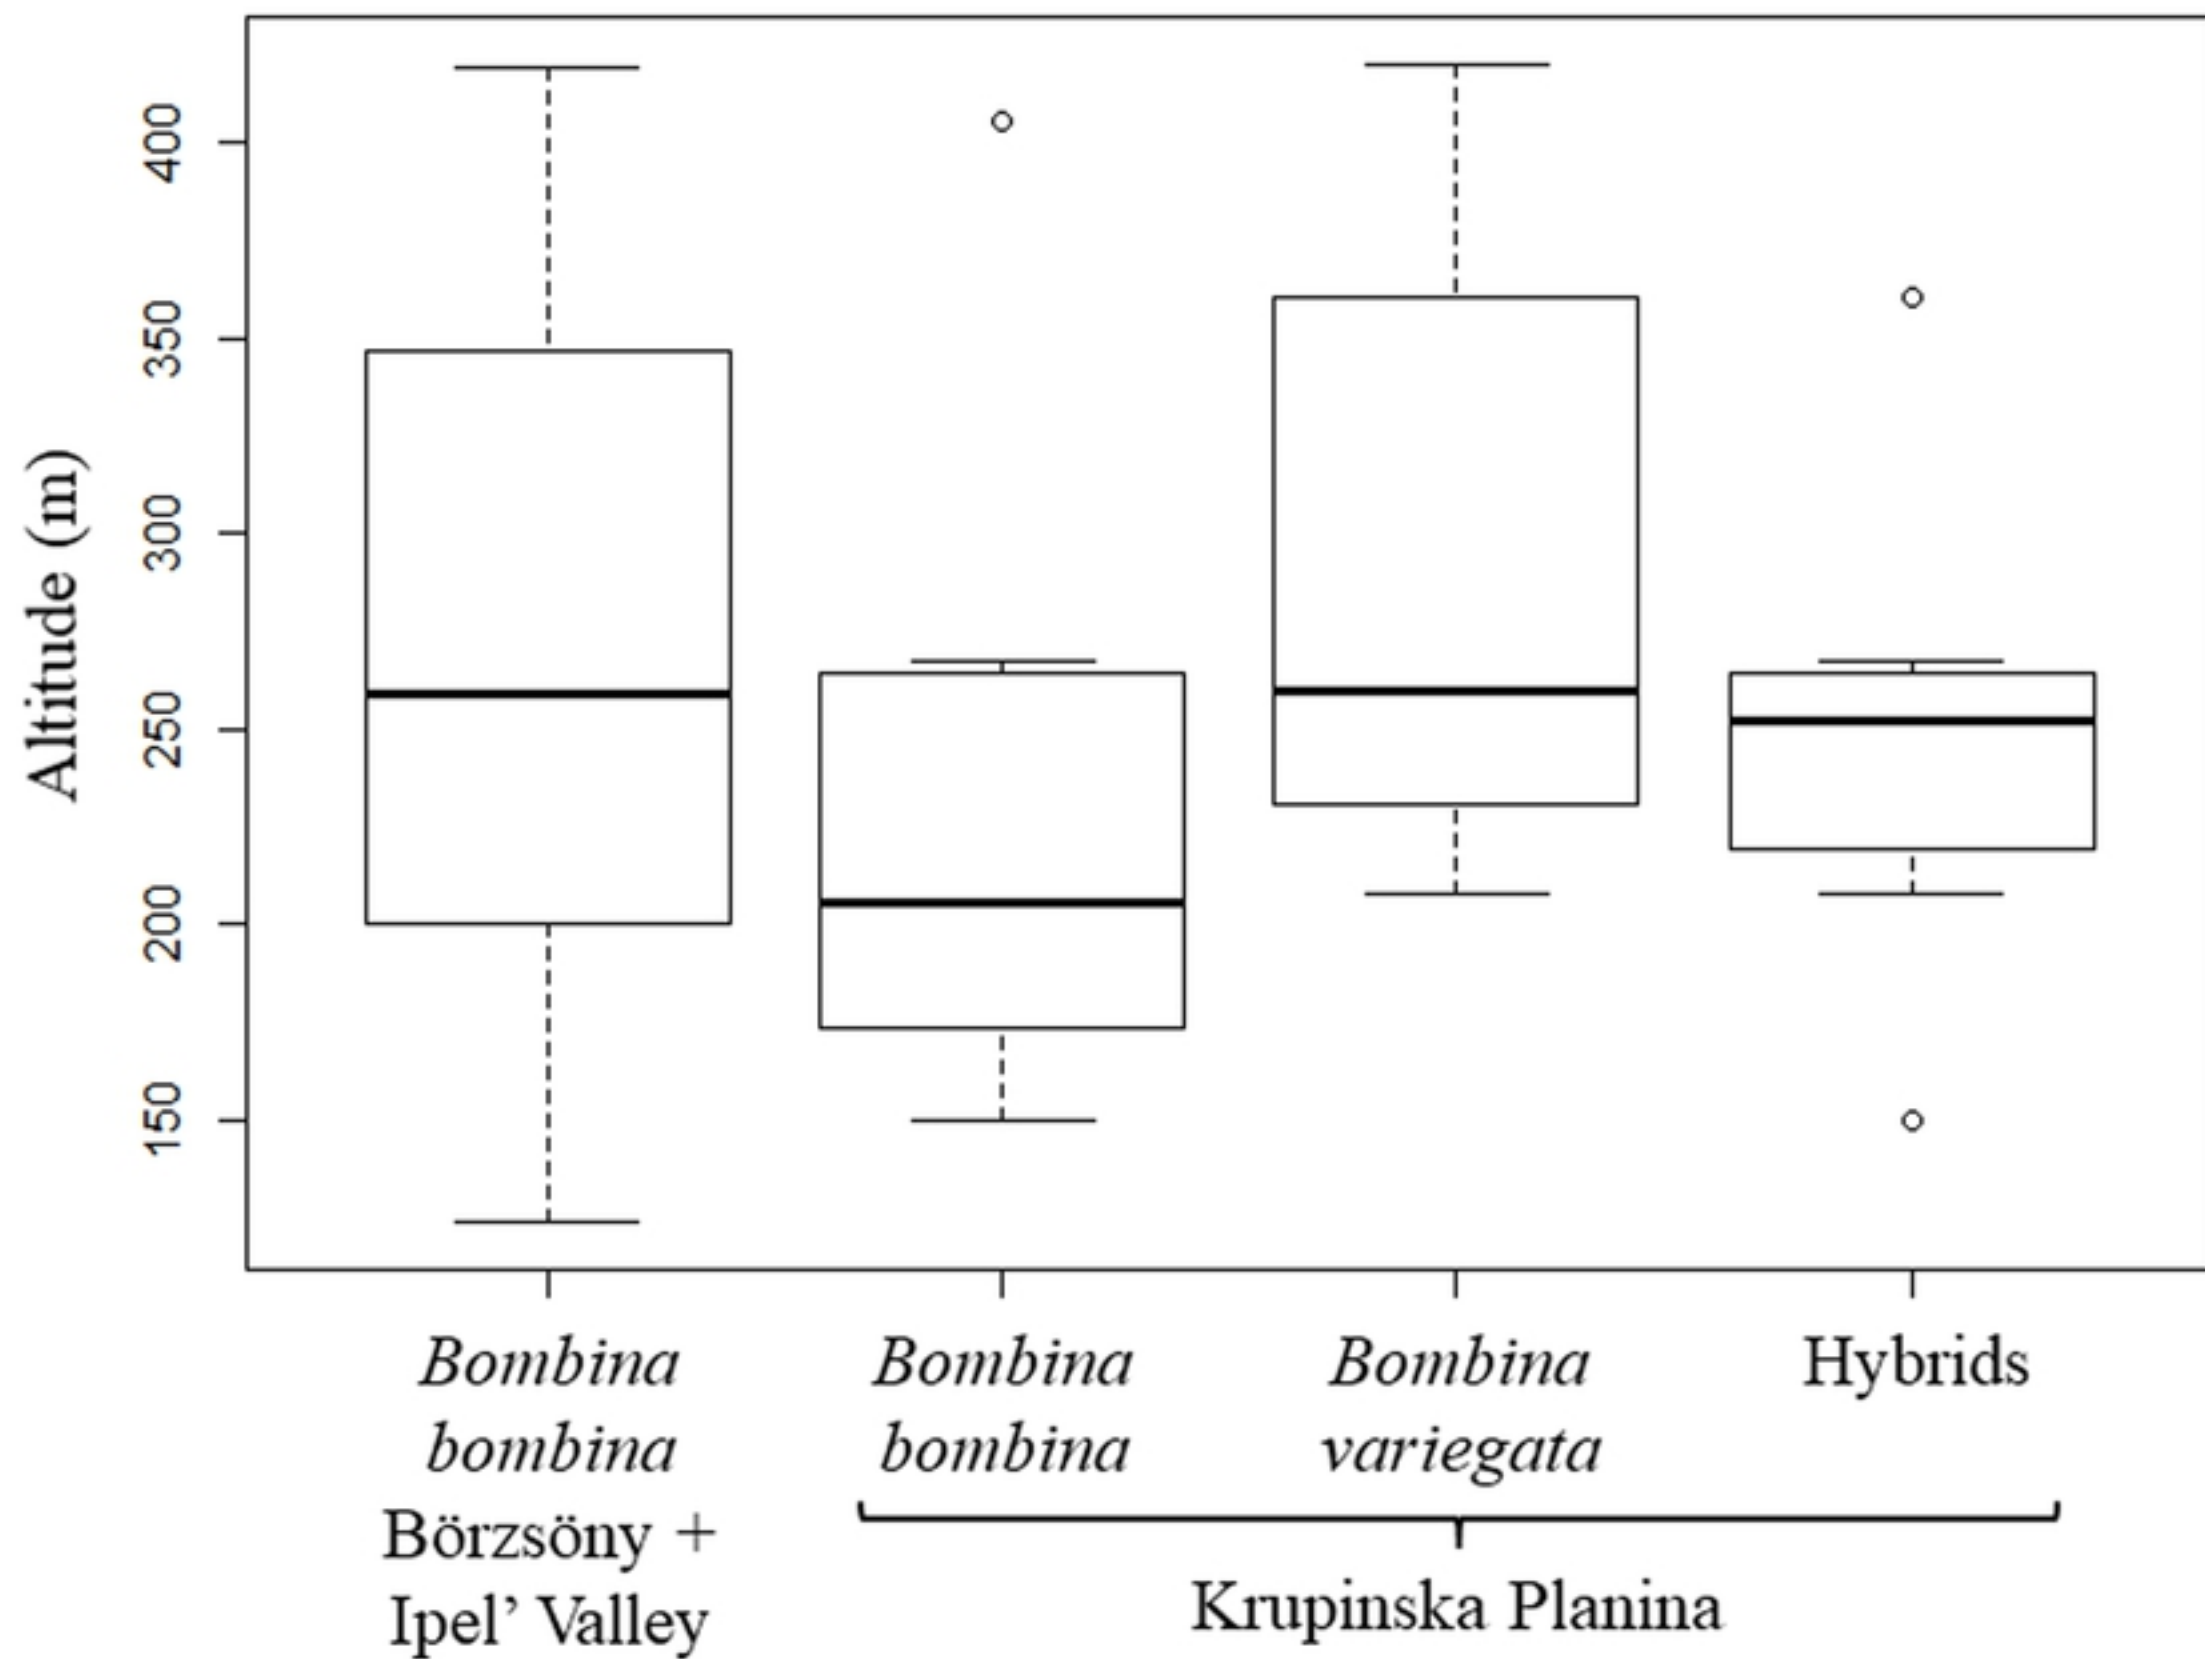

Fig4
